# Supplementary material for: Overexpression of novel long intergenic non-coding RNA LINC02454 is associated with a poor prognosis in papillary thyroid cancer
Source: PubMed Central journal article supplement — Oncol Rep. 2020 Aug 3;44(4):1489–501. doi: 10.3892/or.2020.7712 (PMC7448410; doi:10.3892/or.2020.7712), 2020-08-03
Supplement: Supplementary_Data.pdf [file Supplementary_Data.pdf]

Figure S1. Expression of differentially expressed lncRNAs in the TCGA database.

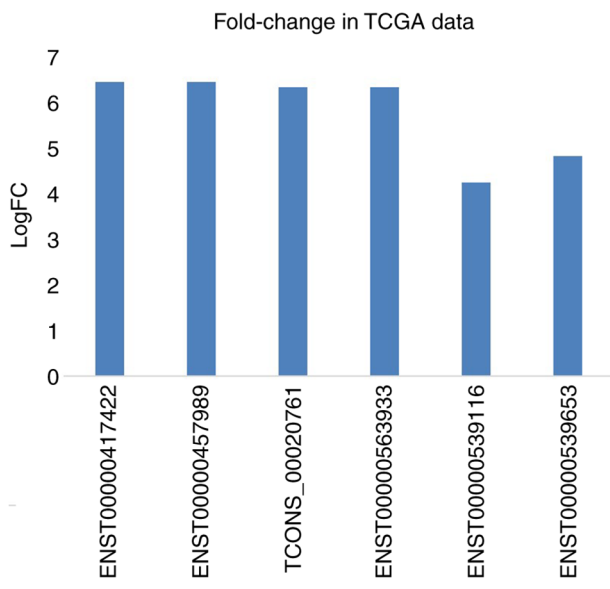

Figure S2. Expression of differentially expressed lncRNAs between the microarray and RT-qPCR results. The heights of the columns represent the log-transformed median fold changes (tumor/normal tissues) in the expression in 54 paired PTC and non-cancerous thyroid tissues. PTC, papillary thyroid cancer.

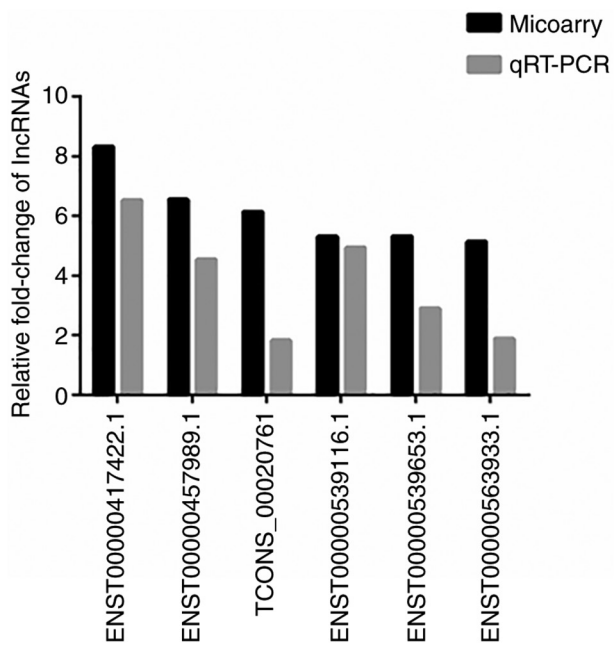

Figure S3. Four representative pathological images of PTC and normal control samples. PTC, papillary thyroid cancer. (A) A male 56-year-old patient with PTC. (B) A female 32-year-old patient with PTC. (C) A female patient 45-year-old with PTC. (D) A male 55-year-old patient with PTC. PTC, papillary thyroid cancer.

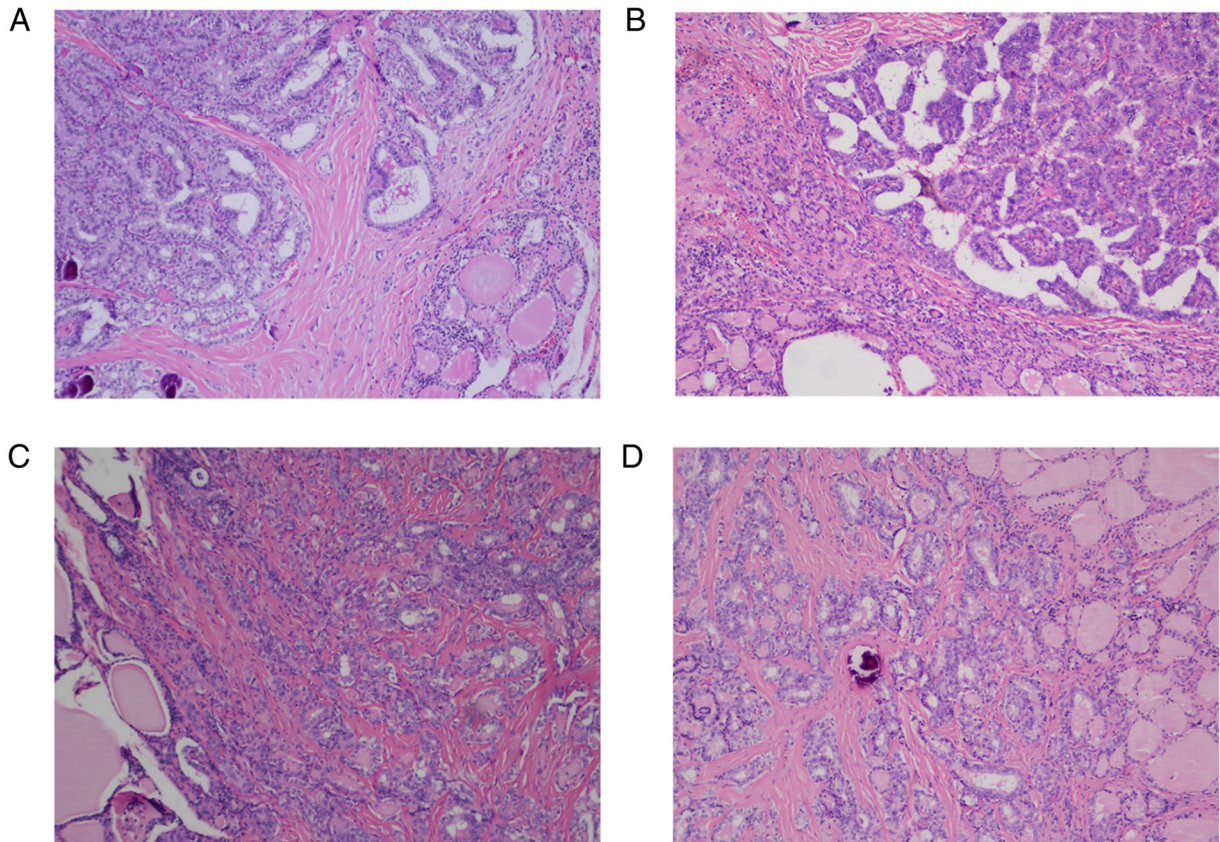

Figure S4. Cut-off point determination using ROC curve. (A) Histogram of LINC02454 expression level in 484 patients with PTC from the TCGA database classifying them into 2 groups according to the cut-off point determined by the Youden index. (B) ROC curve as a result of Youden index method with optimal cut-off point for LINC02454 and the quality of the prediction assessed by the AUC. ROC, receiver operating characteristic; AUC, area under the curve; PTC, papillary thyroid cancer.

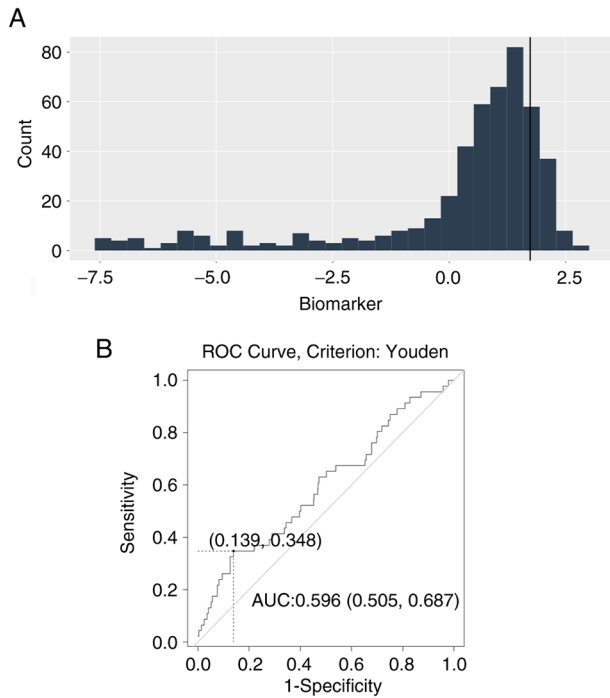

Figure S5. Association of clinical traits and disease-free survival in the TCGA PTC cohort. Poor disease-free survival was associated with (B) an advanced N stage (0.0386), (C) an advanced pathological stage (P=0.000827), and (D) an advanced T stage (P=0.00205), but not with (A) a higher lymph node count (P=0.534). PTC, papillary thyroid cancer.

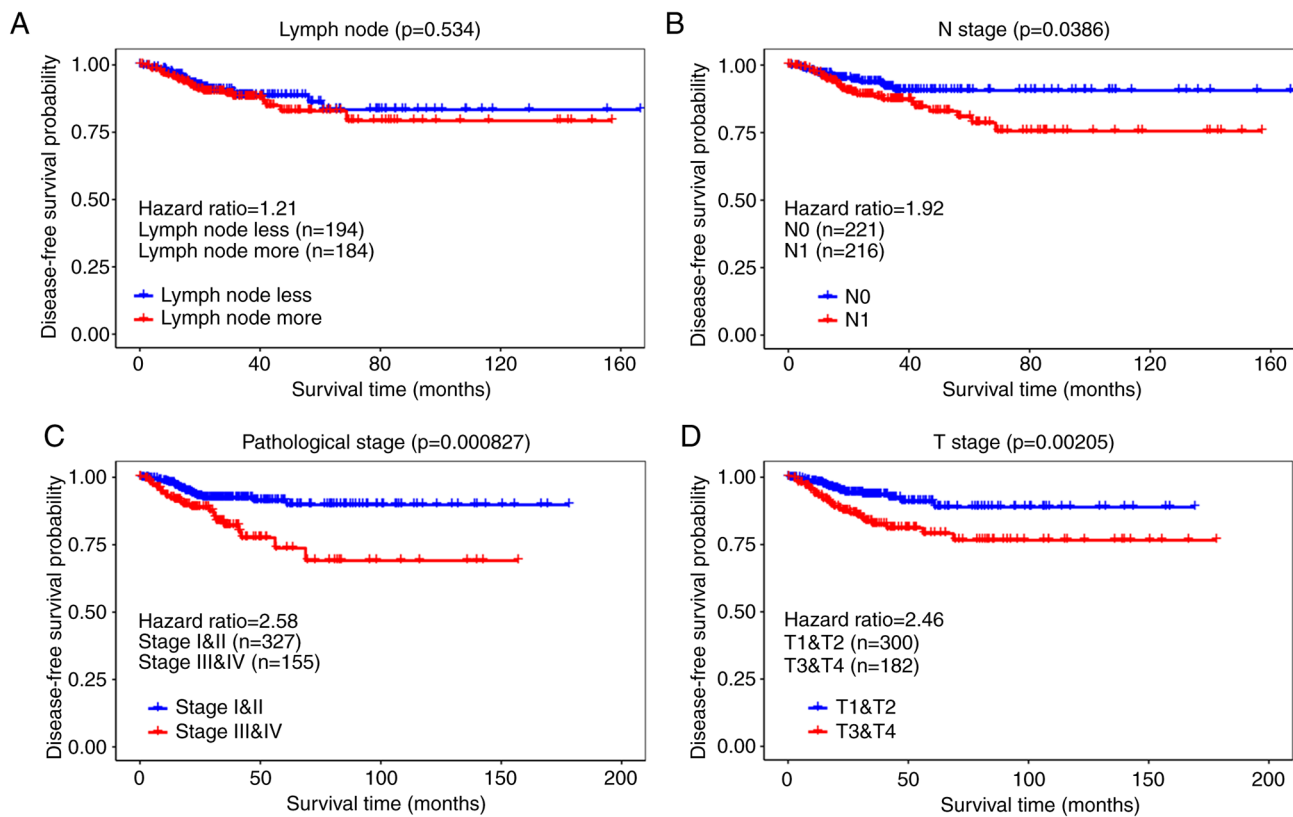

Table SI. Top 10 differentially expressed upregulated lncRNAs in the microarray.

| lncRNA ID                | Fold Change     | P -value        |
|--------------------------|-----------------|-----------------|
| ENST00000417422.1        | 317.4575        | 0.000031        |
| ENST00000457989.1        | 94.12319        | 0.000003        |
| XR_429125.1              | 89.38535        | 0.000109        |
| TCONS_00020761           | 70.23221        | 0.000251        |
| HIT000218960             | 64.69215        | 0.006213        |
| uc021ssa.1               | 43.16758        | 0.000024        |
| <b>ENST00000539116.1</b> | <b>40.02352</b> | <b>0.002246</b> |
| ENST00000539653.1        | 39.99428        | 0.001013        |
| ENST00000563933.1        | 35.21136        | 0.000805        |
| TCONS_00010527           | 31.60832        | 0.001210        |

LINC02454 has two transcripts (ENST00000539116.1 and ENST00000541391.1). The quantitative primers are designed in the common exon to reflect the total transcription of LINC02454. Bold font indicates that ENST00000539116.1 is one of the transcripts of LINC02454.
